# Supplementary material for: An immortal porcine preadipose cell strain for efficient production of cell-cultured fat
Source: Research Square preprint supplement (doi:10.21203/rs.3.rs-2799093/v1), 2023-04-25
Supplement: Supplementary file 1 [file 27d671e7f35bf3ba2452d1ab.xlsx]

## Sheet: Sheet1
Primer	Sequence（5’to3’）
36B4-F	AGATGCAGCAGATCCGCAT
36B4-R	GTTCTTGCCCATCAGCACC
pigFabp4-R	CCCTGGTACAGGTGCAGAAG
pigFabp4-F	TGGTAGCCGTGACACCTTTC
pigPlin1-F	GCTTACGAGAAGGGCATCCA
pigPlin1-R	TGGAGGGCCGGTATCTTTTC
pigADIPOQ-F	CGAGAAGCCTGGAGCACTAC
pigADIPOQ-R	CTTTTCTGCCCGGGATTCCT
miceMyh1-F	GCCCAGTGGAGGACAAAATA
miceMyh1-R	TCTACGTGCTCCTCAGCAT
miceMyoD-F	AACTGCTCTGATGGCATGATGGATT
miceMyoD-R	CTCGACACAGCCGCACTCTT
miceMyoG-F	GTCCCAACCCAGGAGATCATT
miceMyoG-R	AGTTGGGCATGGTTTCGTCT
